# Supplementary material
Source: PubMed Central journal article supplement (PMC8863617)
Supplement: NIHMS1766149-supplement-1.pdf [file NIHMS1766149-supplement-1.pdf]

**Appendix**  
**Role of Mental Health in the Association Between E-Cigarettes and Cannabis Use**  
**Duan et al.**

**Appendix Figure 1.** Flowchart for participants included in final analysis.

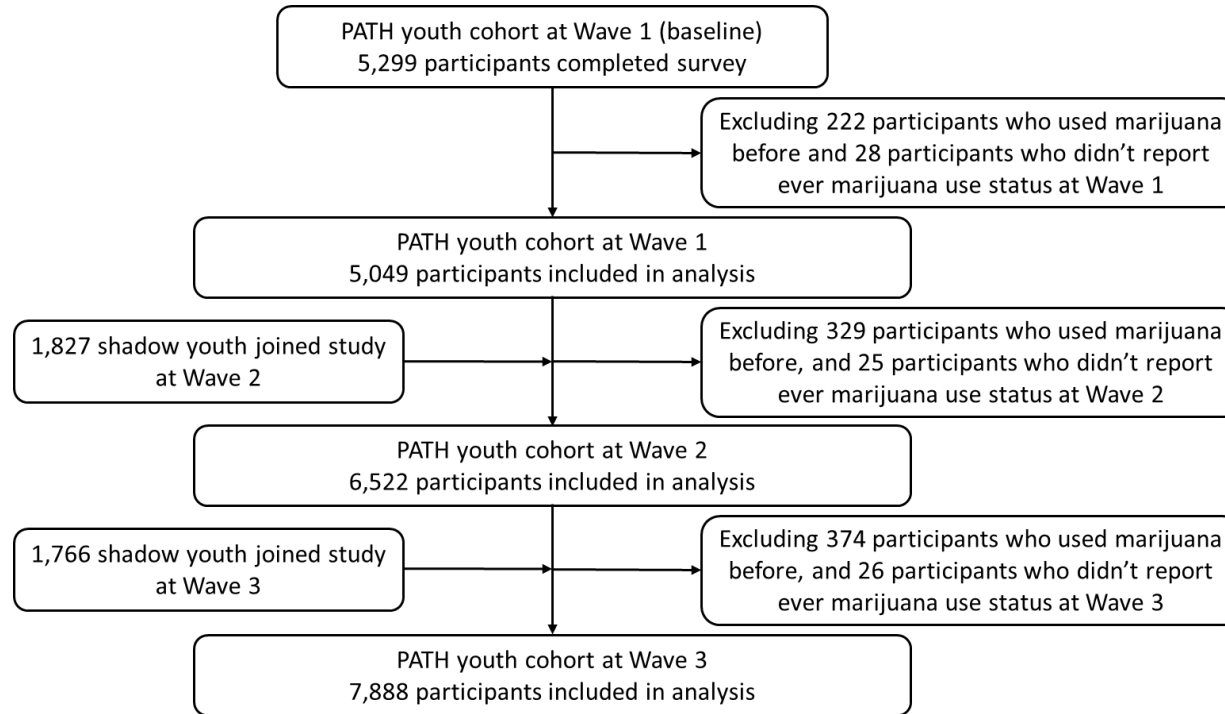

PATH, Population Assessment of Tobacco and Health Study.

**Appendix**  
**Role of Mental Health in the Association Between E-Cigarettes and Cannabis Use**  
**Duan et al.**

**Appendix Figure 2.** Weighted prevalence of past-30-day cannabis use at follow-up waves by baseline e-cigarette use and mental health conditions.

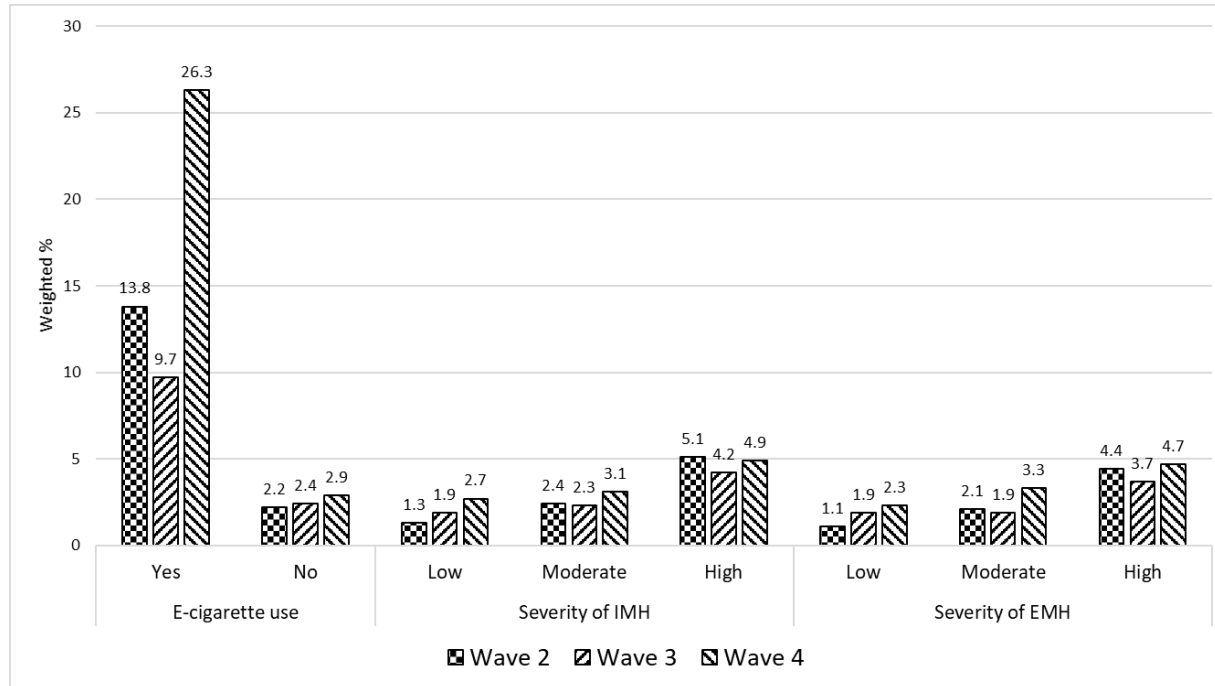

IMH, internalizing mental health problems; EMH, externalizing mental health problems.

**Appendix**  
**Role of Mental Health in the Association Between E-Cigarettes and Cannabis Use**  
**Duan et al.**

**Appendix Table 1.** Items for Internalizing and Externalizing Mental Health Problems

| <b>GAIN-SS Subscale<sup>a</sup></b>                                | <b>Items</b>                                                                                      |
|--------------------------------------------------------------------|---------------------------------------------------------------------------------------------------|
| Internalizing mental health problems                               | Feeling very trapped, lonely, sad, blue, depressed, or hopeless about the future.                 |
|                                                                    | Sleep trouble - such as bad dreams, sleeping restlessly or falling asleep during the day.         |
|                                                                    | Feeling very anxious, nervous, tense, scared, panicked or like something bad was going to happen. |
|                                                                    | Becoming very distressed and upset when something reminded you of the past.                       |
| Externalizing mental health problems                               | Lied or conned to get things you wanted or to avoid having to do something.                       |
|                                                                    | Had a hard time paying attention at school, work, or home.                                        |
|                                                                    | Had a hard time listening to instructions at school, work, or home.                               |
|                                                                    | Were a bully or threatened other people.                                                          |
|                                                                    | Started physical fights with other people.                                                        |
|                                                                    | Felt restless or the need to run around or climb on things.                                       |
| Gave answers before the other person finished asking the question. |                                                                                                   |

<sup>a</sup>GAIN-SS: Global Appraisal of Individual Needs – Short Screener.

**Appendix**  
**Role of Mental Health in the Association Between E-Cigarettes and Cannabis Use**  
**Duan et al.**

**Appendix Table 2.** Percentage of Ever Cannabis Use at Each Follow-Up Wave by Baseline Covariates

| Covariates at corresponding baseline wave    | Wave 1<br>% (95% CI) | Wave 2<br>% (95% CI) | Wave 3<br>% (95% CI) |
|----------------------------------------------|----------------------|----------------------|----------------------|
| Overall ever cannabis use at follow-up waves | 5.9 (5.3, 6.6)       | 5.7 (5.0, 6.3)       | 7.7 (7.1, 8.3)       |
| P30D e-cigarette use                         |                      |                      |                      |
| Yes                                          | 24.4 (10.5, 47.0)    | 19.9 (12.5, 30.3)    | 41.1 (31.7, 51.2)    |
| No                                           | 5.8 (5.2, 6.5)       | 5.5 (4.9, 6.2)       | 7.2 (6.6, 7.8)       |
| Internalizing mental health problems         |                      |                      |                      |
| Low                                          | 3.9 (3.2, 4.8)       | 3.9 (3.3, 4.6)       | 5.9 (5.2, 6.8)       |
| Moderate                                     | 6.0 (4.9, 7.4)       | 6.2 (5.1, 7.6)       | 7.9 (6.6, 9.3)       |
| High                                         | 11.8 (9.6, 14.3)     | 10.0 (8.2, 12.1)     | 12.2 (10.8, 13.8)    |
| Externalizing mental health problems         |                      |                      |                      |
| Low                                          | 3.1 (2.4, 4.1)       | 3.3 (2.7, 4.2)       | 5.1 (4.4, 6.0)       |
| Moderate                                     | 5.4 (4.3, 6.7)       | 5.4 (4.2, 6.8)       | 8.1 (6.8, 9.5)       |
| High                                         | 10.9 (9.3, 12.7)     | 9.6 (8.2, 11.3)      | 11.7 (10.5, 13.0)    |
| Age group, years                             |                      |                      |                      |
| 12–14                                        | 5.8 (5.2, 6.6)       | 4.7 (4.1, 5.4)       | 5.6 (5.0, 6.2)       |
| 15–17                                        | 8.1 (4.5, 14.1)      | 9.1 (7.6, 10.8)      | 11.6 (10.4, 12.9)    |
| Sex                                          |                      |                      |                      |
| Male                                         | 5.5 (4.7, 6.5)       | 5.9 (5.1, 6.9)       | 7.2 (6.4, 8.0)       |
| Female                                       | 6.3 (5.4, 7.4)       | 5.4 (4.6, 6.3)       | 8.2 (7.3, 9.2)       |
| Race/ethnicity                               |                      |                      |                      |
| Non-Hispanic White                           | 5.6 (4.8, 6.6)       | 6.0 (5.1, 7.1)       | 8.0 (7.1, 9.0)       |
| Non-Hispanic Black                           | 7.8 (5.5, 10.9)      | 4.8 (3.4, 6.8)       | 8.5 (6.8, 10.5)      |
| Non-Hispanic other                           | 2.7 (1.5, 4.9)       | 4.3 (2.5, 7.2)       | 5.3 (4.0, 7.1)       |
| Hispanic                                     | 6.8 (5.7, 8.3)       | 5.8 (4.8, 7.0)       | 8.0 (6.8, 9.4)       |
| Sexual orientation (ages ≥14 years)          |                      |                      |                      |
| Straight/heterosexual                        | 8.4 (7.1, 10.1)      | 8.0 (7.0, 9.1)       | 10.1 (9.1, 11.3)     |
| Gay, lesbian, bisexual, or other             | 18.8 (9.4, 33.9)     | 14.6 (9.7, 21.3)     | 16.7 (13.1, 21.0)    |
| P30D combustible tobacco use <sup>a</sup>    |                      |                      |                      |
| Yes                                          | 32.8 (19.1, 50.2)    | 28.1 (15.8, 44.8)    | 39.0 (26.6, 53.1)    |
| No                                           | 5.9 (5.2, 6.6)       | 5.5 (4.8, 6.2)       | 7.4 (6.9, 8.0)       |
| P30D alcohol use                             |                      |                      |                      |

**Appendix**  
**Role of Mental Health in the Association Between E-Cigarettes and Cannabis Use**  
**Duan et al.**

|                                  |                   |                   |                   |
|----------------------------------|-------------------|-------------------|-------------------|
| Yes                              | 24.7 (15.8, 36.3) | 17.5 (12.9, 23.2) | 28.1 (23.1, 33.8) |
| No                               | 5.6 (5.0, 6.3)    | 5.2 (4.6, 5.9)    | 6.8 (6.2, 7.3)    |
| Parental education               |                   |                   |                   |
| Less than high school            | 8.6 (7.0, 10.5)   | 5.1 (3.9, 6.6)    | 8.7 (7.4, 10.2)   |
| High school graduate             | 7.4 (5.6, 9.6)    | 6.6 (5.1, 8.6)    | 7.3 (6.0, 8.9)    |
| Some college or associate degree | 5.7 (4.5, 7.2)    | 7.2 (6.0, 8.7)    | 8.8 (7.8, 10.0)   |
| Bachelor's degree or higher      | 4.4 (3.5, 5.5)    | 4.4 (3.4, 5.7)    | 6.6 (5.6, 7.7)    |
| State recreational cannabis law  |                   |                   |                   |
| Legalized                        | 9.1 (5.6, 14.4)   | 5.4 (3.2, 8.9)    | 8.2 (7.0, 9.6)    |
| Not legalized                    | 5.7 (5.1, 6.4)    | 5.7 (5.0, 6.4)    | 7.6 (6.9, 8.2)    |

<sup>a</sup>Combustible tobacco included cigarette, cigar, cigarillo, and filtered cigar.

P30D, past-30-day.

**Appendix**  
**Role of Mental Health in the Association Between E-Cigarettes and Cannabis Use**  
**Duan et al.**

**Appendix Table 3.** AORs of Ever Cannabis Use During Follow-Up Among Baseline Cannabis-Naïve Adolescents

| <b>Baseline characteristics</b>                   | <b>Model 1</b><br><b>No interaction</b><br><b>AOR (95% CI)</b> | <b>Model 2</b><br><b>IMH interaction</b><br><b>AOR (95% CI)</b> | <b>Model 3</b><br><b>EMH interaction</b><br><b>AOR (95% CI)</b> |
|---------------------------------------------------|----------------------------------------------------------------|-----------------------------------------------------------------|-----------------------------------------------------------------|
| <b>P30D e-cigarette use</b>                       |                                                                |                                                                 |                                                                 |
| Yes                                               | <b>3.24 (2.09, 5.02)</b>                                       | <b>6.56 (3.77, 11.43)</b>                                       | <b>5.79 (2.69, 12.46)</b>                                       |
| No                                                | ref                                                            | ref                                                             | ref                                                             |
| <b>Internalizing mental health problems (IMH)</b> |                                                                |                                                                 |                                                                 |
| Low                                               | ref                                                            | ref                                                             | ref                                                             |
| Moderate                                          | 1.11 (0.93, 1.32)                                              | 1.13 (0.95, 1.34)                                               | 1.11 (0.93, 1.32)                                               |
| High                                              | <b>1.46 (1.18, 1.79)</b>                                       | <b>1.53 (1.24, 1.89)</b>                                        | <b>1.46 (1.18, 1.80)</b>                                        |
| <b>Externalizing mental health problems (EMH)</b> |                                                                |                                                                 |                                                                 |
| Low                                               | ref                                                            | ref                                                             | ref                                                             |
| Moderate                                          | <b>1.55 (1.24, 1.93)</b>                                       | <b>1.55 (1.24, 1.89)</b>                                        | <b>1.58 (1.27, 1.98)</b>                                        |
| High                                              | <b>2.27 (1.85, 2.78)</b>                                       | <b>2.27 (1.85, 2.78)</b>                                        | <b>2.31 (1.87, 2.85)</b>                                        |
| <b>P30D e-cigarette use X IMH</b>                 |                                                                |                                                                 |                                                                 |
| Yes X High                                        |                                                                | <b>0.21 (0.09, 0.48)</b>                                        |                                                                 |
| Yes X Moderate                                    |                                                                | 0.66 (0.27, 1.57)                                               |                                                                 |
| No X Low                                          |                                                                | ref                                                             |                                                                 |
| <b>P30D e-cigarette use X EMH</b>                 |                                                                |                                                                 |                                                                 |
| Yes X High                                        |                                                                |                                                                 | 0.49 (0.19, 1.26)                                               |
| Yes X Moderate                                    |                                                                |                                                                 | 0.41 (0.11, 1.46)                                               |
| No X Low                                          |                                                                |                                                                 | ref                                                             |
| <b>Age group, years</b>                           |                                                                |                                                                 |                                                                 |
| 12–14                                             | ref                                                            | ref                                                             | ref                                                             |
| 15–17                                             | <b>1.81 (1.56, 2.10)</b>                                       | <b>1.81 (1.56, 2.10)</b>                                        | <b>1.81 (1.56, 2.11)</b>                                        |
| <b>Sex</b>                                        |                                                                |                                                                 |                                                                 |
| Male                                              | 1.02 (0.88, 1.21)                                              | 1.01 (0.85, 1.20)                                               | 1.02 (0.88, 1.17)                                               |
| Female                                            | ref                                                            | ref                                                             | ref                                                             |
| <b>Race/ethnicity</b>                             |                                                                |                                                                 |                                                                 |
| Non-Hispanic White                                | ref                                                            | ref                                                             | ref                                                             |
| Non-Hispanic Black                                | 1.12 (0.89, 1.41)                                              | 1.12 (0.89, 1.41)                                               | 1.12 (0.89, 1.41)                                               |
| Non-Hispanic other                                | <b>0.67 (0.52, 0.87)</b>                                       | <b>0.67 (0.52, 0.87)</b>                                        | <b>0.67 (0.51, 0.87)</b>                                        |

**Appendix**  
**Role of Mental Health in the Association Between E-Cigarettes and Cannabis Use**  
**Duan et al.**

|                                                 |                          |                          |                          |
|-------------------------------------------------|--------------------------|--------------------------|--------------------------|
| Hispanic                                        | 1.02 (0.86, 1.21)        | 1.01 (0.85, 1.20)        | 1.02 (0.86, 1.21)        |
| <b>P30D combustible tobacco use<sup>a</sup></b> |                          |                          |                          |
| Yes                                             | <b>2.97 (1.59, 5.54)</b> | <b>2.97 (1.64, 5.37)</b> | <b>2.90 (1.55, 5.41)</b> |
| No                                              | ref                      | ref                      | ref                      |
| <b>P30D alcohol use</b>                         |                          |                          |                          |
| Yes                                             | <b>3.25 (2.48, 4.27)</b> | <b>3.27 (2.49, 4.29)</b> | <b>3.27 (2.50, 4.29)</b> |
| No                                              | ref                      | ref                      | ref                      |
| <b>Parental education</b>                       |                          |                          |                          |
| Less than high school                           | ref                      | ref                      | ref                      |
| High school graduate                            | 0.89 (0.72, 1.11)        | 0.90 (0.72, 1.12)        | 0.89 (0.72, 1.11)        |
| Some college or associate degree                | 0.90 (0.73, 1.09)        | 0.89 (0.73, 1.09)        | 0.89 (0.73, 1.09)        |
| Bachelor's degree or higher                     | <b>0.65 (0.54, 0.79)</b> | <b>0.65 (0.54, 0.79)</b> | <b>0.65 (0.54, 0.79)</b> |
| <b>State recreational cannabis law</b>          |                          |                          |                          |
| Legalized                                       | 1.22 (0.96, 1.53)        | 1.23 (0.97, 1.54)        | 1.22 (0.97, 1.54)        |
| Not legalized                                   | ref                      | ref                      | ref                      |

*Note:* Boldface indicates statistical significance ( $p < 0.05$ ).

<sup>a</sup>Combustible tobacco included cigarette, cigar, cigarillo, and filtered cigar.

P30D, past-30-day..

**Appendix**  
**Role of Mental Health in the Association Between E-Cigarettes and Cannabis Use**  
**Duan et al.**

**Appendix Table 4.** Subgroup Analysis for Adjusted Associations Among Adolescent Never Used Cannabis at Baseline

| Baseline e-cigarette using status | Ever cannabis use for low<br>internalizing problems | Ever cannabis use for<br>moderate internalizing<br>problems | Ever cannabis use for high<br>internalizing problems |
|-----------------------------------|-----------------------------------------------------|-------------------------------------------------------------|------------------------------------------------------|
|                                   | AOR <sup>a</sup> (95% CI)                           | AOR <sup>a</sup> (95% CI)                                   | AOR <sup>a</sup> (95% CI)                            |
| P30D e-cigarette use              |                                                     |                                                             |                                                      |
| Yes                               | <b>5.84 (3.09, 11.03)</b>                           | <b>5.25 (2.31, 11.92)</b>                                   | 1.49 (0.73, 3.08)                                    |
| No                                | ref                                                 | ref                                                         | ref                                                  |

*Note:* Boldface indicates statistical significance ( $p < 0.05$ ).

<sup>a</sup>Controlling for wave, sex, age, race/ethnicity, parental education, past-year externalizing mental health problems, P30D combustible tobacco use, P30D alcohol use, state-level cannabis legalization status at baseline.

P30D, past-30-day.



**Appendix**  
**Role of Mental Health in the Association Between E-Cigarettes and Cannabis Use**  
**Duan et al.**

**Appendix Table 5.** AORs of P30D Cannabis Use at Follow-Up Among Baseline Cannabis-Naïve Adolescents

| <b>Baseline characteristics</b>                        | <b>Model 1<br/>Without interaction<br/>AOR (95% CI)</b> | <b>Model 2<br/>IMH interaction<br/>AOR (95% CI)</b> | <b>Model 3<br/>EMH interaction<br/>AOR (95% CI)</b> |
|--------------------------------------------------------|---------------------------------------------------------|-----------------------------------------------------|-----------------------------------------------------|
| <b>P30D e-cigarette use</b>                            |                                                         |                                                     |                                                     |
| Yes                                                    | <b>4.77 (2.92, 7.81)</b>                                | <b>14.58 (7.28, 29.19)</b>                          | <b>7.48 (2.95, 18.96)</b>                           |
| No                                                     | ref                                                     | ref                                                 | ref                                                 |
| Internalizing mental health problems (IMH, continuous) | 1.07 (0.99, 1.16)                                       | <b>1.10 (1.02, 1.19)</b>                            | 1.07 (0.99, 1.16)                                   |
| Externalizing mental health problems (EMH, continuous) | <b>1.13 (1.06, 1.20)</b>                                | <b>1.13 (1.06, 1.20)</b>                            | <b>1.14 (1.07, 1.22)</b>                            |
| <b>P30D e-cigarette use X IMH</b>                      |                                                         |                                                     |                                                     |
| Yes X >0                                               |                                                         | <b>0.60 (0.44, 0.82)</b>                            |                                                     |
| No X 0                                                 |                                                         | ref                                                 |                                                     |
| <b>P30D e-cigarette use X EMH</b>                      |                                                         |                                                     |                                                     |
| Yes X >0                                               |                                                         |                                                     | 0.88 (0.69, 1.12)                                   |
| No X 0                                                 |                                                         |                                                     | ref                                                 |
| <b>Age group, years</b>                                |                                                         |                                                     |                                                     |
| 12–14                                                  | ref                                                     | ref                                                 | ref                                                 |
| 15–17                                                  | <b>1.70 (1.35, 2.14)</b>                                | <b>1.67 (1.33, 2.11)</b>                            | <b>1.69 (1.34, 2.14)</b>                            |
| <b>Sex</b>                                             |                                                         |                                                     |                                                     |
| Male                                                   | 0.91 (0.73, 1.14)                                       | 0.91 (0.73, 1.14)                                   | 0.92 (0.73, 1.14)                                   |
| Female                                                 | ref                                                     | ref                                                 | ref                                                 |
| <b>Race/ethnicity</b>                                  |                                                         |                                                     |                                                     |
| Non-Hispanic White                                     | ref                                                     | ref                                                 | ref                                                 |
| Non-Hispanic Black                                     | 1.08 (0.74, 1.57)                                       | 1.07 (0.74, 1.55)                                   | 1.08 (0.74, 1.56)                                   |
| Non-Hispanic other                                     | <b>0.52 (0.34, 0.81)</b>                                | <b>0.52 (0.34, 0.81)</b>                            | <b>0.52 (0.34, 0.81)</b>                            |
| Hispanic                                               | 0.87 (0.66, 1.13)                                       | 0.85 (0.65, 1.10)                                   | 0.86 (0.66, 1.12)                                   |
| <b>P30D combustible tobacco use<sup>a</sup></b>        |                                                         |                                                     |                                                     |
| Yes                                                    | <b>2.19 (1.05, 4.58)</b>                                | <b>2.23 (1.09, 4.54)</b>                            | <b>2.16 (1.04, 4.50)</b>                            |
| No                                                     | ref                                                     | ref                                                 | ref                                                 |
| <b>P30D alcohol use</b>                                |                                                         |                                                     |                                                     |
| Yes                                                    | <b>3.35 (2.32, 4.84)</b>                                | <b>3.41 (2.36, 4.94)</b>                            | <b>3.37 (2.33, 4.86)</b>                            |
| No                                                     | ref                                                     | ref                                                 | ref                                                 |
| <b>Parental education</b>                              |                                                         |                                                     |                                                     |

**Appendix**  
**Role of Mental Health in the Association Between E-Cigarettes and Cannabis Use**  
**Duan et al.**

|                                  |                          |                          |                          |
|----------------------------------|--------------------------|--------------------------|--------------------------|
| Less than high school            | ref                      | ref                      | ref                      |
| High school graduate             | 0.72 (0.49, 1.06)        | 0.73 (0.50, 1.06)        | 0.72 (0.49, 1.06)        |
| Some college or associate degree | 0.81 (0.63, 1.04)        | 0.79 (0.61, 1.01)        | 0.81 (0.63, 1.04)        |
| Bachelor's degree or higher      | <b>0.59 (0.43, 0.82)</b> | <b>0.58 (0.42, 0.81)</b> | <b>0.59 (0.43, 0.82)</b> |
| State recreational cannabis law  |                          |                          |                          |
| Legalized                        | 1.32 (0.95, 1.82)        | 1.35 (0.98, 1.86)        | 1.32 (0.96, 1.82)        |
| Not legalized                    | ref                      | ref                      | ref                      |

*Note:* Boldface indicates statistical significance ( $p < 0.05$ ).

<sup>a</sup>Combustible tobacco included cigarette, cigar, cigarillo, and filtered cigar.

P30D, past-30-day.

**Appendix**  
**Role of Mental Health in the Association Between E-Cigarettes and Cannabis Use**  
**Duan et al.**

**Appendix Table 6.** Percentage of P30D E-Cigarette Use at Baseline by Internalizing and Externalizing Mental Health Conditions

| Covariates at corresponding baseline wave | Wave 1<br>% (95% CI) | Wave 2<br>% (95% CI) | Wave 3<br>% (95% CI) |
|-------------------------------------------|----------------------|----------------------|----------------------|
| Internalizing mental health problems      |                      |                      |                      |
| Low                                       | 0.4 (0.2, 0.7)       | 0.6 (0.3, 0.9)       | 1.3 (0.9, 1.7)       |
| Moderate                                  | 0.5 (0.2, 1.2)       | 0.6 (0.4, 1.1)       | 0.9 (0.6, 1.4)       |
| High                                      | 1.4 (0.8, 2.5)       | 1.9 (1.2, 3.1)       | 2.4 (1.7, 3.3)       |
| Externalizing mental health problems      |                      |                      |                      |
| Low                                       | 0.2 (0.1, 0.7)       | 0.5 (0.3, 0.9)       | 1.1 (0.8, 1.6)       |
| Moderate                                  | 0.5 (0.2, 1.1)       | 0.6 (0.3, 1.1)       | 1.2 (0.7, 1.8)       |
| High                                      | 1.2 (0.7, 1.9)       | 1.6 (1.0, 2.4)       | 2.1 (1.6, 2.1)       |
